# Supplementary material
Source: PubMed Central journal article supplement (PMC3794681)
Supplement: 10.3163.1536-5050.101.4.007.sg001.pdf [file 10.3163.1536-5050.101.4.007.sg001.pdf]

## **Strategically aligning a mandala of competencies to advance a transformative vision**

**Nunzia B. Giuse, MD, MLS, FMLA; Sheila V. Kusnoor, PhD; Taneya Y. Koonce, MSLS, MPH; Christopher R. Ryland, MSIS; Rachel R. Walden, MLIS; Helen M. Naylor, MS; Annette M. Williams, MLS; Rebecca N. Jerome, MLIS, MPH**

### **APPENDIX A**

#### **“Bioscience and Genetics in Personalized Medicine” strategic themes**

##### **Contribute to ongoing institutional personalized medicine initiatives that target patient education and communication**

Over the past few years, the Knowledge Management/Eskind Biomedical Library (KM-EBL) team has established core competencies in patient education, health literacy, and communication of genetic information. This unique expertise coupled with a longstanding history of successful collaborations with clinical teams enables KM-EBL to undertake informationist roles in key Vanderbilt University Medical Center (VUMC) patient education and personalized medicine initiatives.

The KM-EBL team will develop a modus operandi for communicating health information to patients. To enhance the ability to take on ever-increasing roles in this capacity throughout the medical center, KM-EBL will work to further develop specialized patient education expertise within a subgroup of the team. Addressing health literacy and meeting patient health informational needs will facilitate the team’s continued alignment with organizational leadership’s vision for a robust patient and family member centered–care environment.

##### **Deliverables**

- Leverage KM-EBL’s in-house training model paradigm to develop an advanced training module in health literacy and patient education strategies.
- Investigate strategies for developing a reusable, consumer-friendly genetic glossary for integration into VUMC patient-focused, personalized medicine projects.
- Explore potential avenues for training within the current framework of rounding with clinical teams, attending journal clubs and meetings, and utilizing existing relationships to provide pharmacogenetic and biochemical expertise that will directly impact the clinical team’s ability to clearly communicate with patients.
- Collaborate with the Office of Patient Education, contributing knowledge management and health literacy expertise, to implement an enterprise-wide patient education solution.
- Collaborate in writing a grant application or contract to further explore models to generate systematic mechanisms for the provision of patient education; representative partners may include Vanderbilt’s Agency for Healthcare Research and Quality (AHRQ)–funded Evidence-based Practice Center, the My Cancer Genome team, Clinical and Translational Science Award (CTSA) programs, etc.

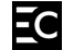

- Independently submit a grant or contract to seek funding to explore strategies to improve patient communication and education.
- Disseminate outcomes from patient education projects via journal manuscripts and/or professional meeting paper or poster presentations.

| <b>Threshold</b>                                                                                                                              | <b>Target</b>                                     | <b>Reach</b>                           |
|-----------------------------------------------------------------------------------------------------------------------------------------------|---------------------------------------------------|----------------------------------------|
| Create the KM advanced patient education module, and test and refine on four KM-EBL team members; complete <b>one</b> additional deliverable. | Completion of <b>two</b> additional deliverables. | Completion of <b>all</b> deliverables. |
