# Supplementary material
Source: PubMed Central journal article supplement (PMC3794681)
Supplement: 10.3163.1536-5050.101.4.007.sg002.pdf [file 10.3163.1536-5050.101.4.007.sg002.pdf]

## Strategically aligning a mandala of competencies to advance a transformative vision

Nunzia B. Giuse, MD, MLS, FMLA; Sheila V. Kusnoor, PhD; Taneya Y. Koonce, MSLS, MPH; Christopher R. Ryland, MSIS; Rachel R. Walden, MLIS; Helen M. Naylor, MS; Annette M. Williams, MLS; Rebecca N. Jerome, MLIS, MPH

### APPENDIX B

#### Knowledge Management and Eskind Biomedical Library Clinical and Translational Science Award (CTSA) support

##### CYP3A5 \*3 and \*6 allele characterization

*Disclaimer:* Knowledge management and library information scientists attempt to provide accurate, inclusive, and informative reports based on the specific questions and relevant data provided to them. All information is treated with strict confidentiality, in keeping with Vanderbilt University policies. Information specialists attempt to report all points of view described in the literature, selecting what they consider the most representative examples of each. Summaries are prepared for the convenience of the clinician, and physicians should consult the full text of the articles before taking action; however, the information provided is no substitute for clinical judgment. It is possible that any given search may omit some relevant information. More extensive bibliographic references for any topic are available upon request.

**Question.** Please characterize CYP3A5 poor performer alleles \*3 and \*6, including functional significance and frequency and indicate other potential target drugs.

**Summary.** The hepatic cytochrome P450 (CYP450) proteins are a superfamily of monooxygenase enzymes, which catalyze the endogenous synthesis of cholesterol, steroids, and other lipids; bioactivate some prodrugs; and biotransform other drugs and toxic chemicals [1]. Many compounds are metabolized by more than 1 cytochrome P450. The cytochrome P450 3A family is responsible for metabolizing approximately 37% of the 200 most commonly prescribed drugs, with cytochromes P450 3A4 (CYP3A4) and 3A5 (CYP3A5) accounting for the majority [2]. CYP3A4 and CYP3A5 are both expressed in liver and intestine, but CYP3A5 is the predominant form expressed in extrahepatic tissues [3] and may account for up to 50% of the total CYP3A activity in liver [4]. CYP3A5 is involved in the metabolism of vasodilators, immunosuppressants, benzodiazepines, and taxanes as well as the steroid hormones testosterone, progesterone, and androstenedione [1, 3]. A list of common substrates, inhibitors, and inducers can be found in the table at the end of this document (CYP3A5 drug table). A more comprehensive list can be found in the summary chapter by Rendic [5].

The CYP3A5 gene is located in a cluster of cytochrome P450 genes on chromosome 7q21.1. The cluster also includes several pseudogenes, one of which, CYP3A5P1, is very similar to CYP3A5 and is known to cause difficulty in cloning this gene [1]. Additionally, CYP3A5 and CYP3A4 share 84% sequence homology [6]. Genetic polymorphisms in metabolizing enzymes are a principal contributor to interindividual variation in the response to numerous drugs. More than 30 polymorphisms in the CYP3A5 gene have been described, many of which affect enzyme

activity [7]. The table below summarizes the functional significance and frequency information from ALFRED (the Allele Frequency Database) [8] and the National Center for Biotechnology Information (NCBI) short genetic variations database dbSNP [9] for the \*3 and \*6 alleles across all populations. For this gene, the nucleotide change indicated below is based on current knowledge of the sequence that produces a functional CYP3A5 protein. Please see the additional material included on page 10 for information about the reference sequence discrepancy [RefSeq summary].

| Allele | SNP(s)     | Δ NT | aa change | functional effect                  | Fst   | Ave Het | # Pop | ~frequency of SNP |
|--------|------------|------|-----------|------------------------------------|-------|---------|-------|-------------------|
| *03    | rs776746   | A>G  | -         | Severely decreased/<br>no activity | 0.296 | 0.285   | 51    | A=.3313; G=.6687  |
| *06    | rs10264272 | G>A  | Lys208=   | Severely decreased/<br>no activity | —     | —       | —     | C=.9427; T=.0573  |

It is important to note that the frequency of CYP3A5\*3 is population dependent (see CYP3A5\*3 below). What follows is a detailed synopsis of the information for the \*3 [CYP3A5\*3] and \*6 [CYP3A5\*6] alleles, including a breakdown of the frequency in different populations.

### CYP3A5\*3

**Functional characterization.** Twelve forms of this variant exist, CYP3A5\*3A-\*3L, but the root single nucleotide polymorphism (SNP) common to all (rs776746) is in the 3rd intron of the CYP3A5 gene [7, 9]. The thymine (T) at chromosomal position 99,270,539 is replaced by a cytosine (C), which corresponds to an adenine (A) at genomic position 12,083 being replaced by a guanine (G) as this gene is on the negative DNA strand [9, 10]. Splice sites are located at the intron-exon junctions in mRNA and are recognized by a ribonuclear complex of proteins and RNA that control genetic splicing called the spliceosome. The spliceosome recognizes specific signals in the nascent RNA, part of which is the consensus splice sequence at the splice junctions and a pyrimidine (cytosine and thymine or uracil) rich tract [11]. Although the final base of the previous exon and initial base of the next exon can vary, the first and last two nucleotides of the intron in the mRNA are always GU and AG. This is illustrated in the image below [11].

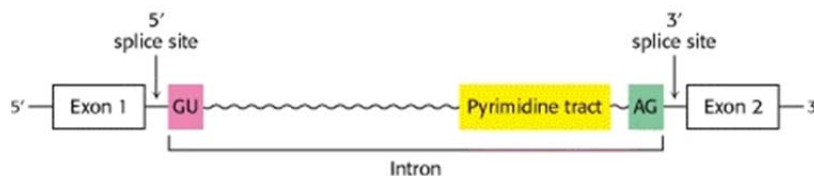

In the CYP3A5 gene, the bases immediately surrounding the position where this mutation (in brackets, red) occurs in the 3rd intron are:

TCTTTAAAGAGCTCTTTTGTCTTTC[A/G]TATCTCTCCCTGTTTGGACCACAT

As the intron begins with GU, and a pyrimidine rich region (the green bases above) exists prior to the AG that occurs in the CYP3A5\*3 allele, Kuehl et al. concluded that by changing the

adenine to a guanine at this location, a cryptic splice site is created [4]. The calculated individual weight matrix ( $R_i$ )\* value increases from -3.2 to 8.2 bits at this position as a result of this mutation, whereas the natural acceptor site remains unchanged at 4.6 bits [12]. Thus, this new stronger cryptic acceptor splice site promotes the insertion of an intronic exon-like sequence into the mature mRNA and as a result, a premature stop codon is introduced upstream [4, 12]. Consequently, the majority of the mRNA is aberrantly spliced, so very little functional protein, if any, is produced [4, 13]. Lamba et al. [14] state that individuals homozygous for the \*3 allele are considered CYP3A5 nonexpressors.

Relatively few groups have performed pharmacokinetic studies. One group found for the reconstituted CYP3A5\*3L allele, the  $V_{max}$  was reduced by 39%; the  $K_m$  increased 2.7 fold, and the overall enzyme activity was 4.3 fold less than wild type [15]. However, as this allele also contains the cryptic splice site, the residual activity observed is a sole result of the Tyr53Cys mutation in what little CYP3A5 protein is generated, rather than the defective splicing [15]. Others have investigated dosing requirements of tacrolimus with respect to genotype and independently observed that at least one wild type (CYP3A5\*1) allele is sufficient for optimal CYP3A5 activity [4, 13, 16]. However, studies in kidney, liver, lung, heart, and renal transplant recipients have demonstrated that patients homozygous for the CYP3A5\*3 allele required significantly less tacrolimus to reach target concentrations than those with at least 1 CYP3A5\*1 allele [16]. Haufroid et al. [16], in data from renal transplant patients, observed that the pharmacokinetic parameter that gave the most realistic idea of the global exposure to tacrolimus is the total area under the curve ( $AUC_{0 \rightarrow \infty}$ ). They determined that the median  $AUC_{0 \rightarrow \infty}$  was 2.1–2.6 fold higher (depending on statistical method used) in non-expressors (individuals homozygous for \*3) [16]. As a result, Haufroid et al. [16] conclude that at least a minimum 2-fold higher tacrolimus loading dose could theoretically be administered to those that have at least 1 functional CYP3A5 allele (\*1/\*1 or \*1/\*3) as compared with those that do not (\*3/\*3), and propose lowering the loading dose in the latter category.

As mentioned above, at least twelve variations of the CYP3A5\*3 allele have been identified and classified [7]. The table below summarizes these alternative versions of the CYP3A5\*3 allele [4, 7, 9, 10, 13, 15, 17, 18].

---

\* Nucleic acid binding sites are analyzed based on information theory weight matrices derived from a comprehensive set of aligned functional sites. The frequencies of nucleotides at each position are used to calculate an individual information weight matrix, ( $R_i(b, l)$ ), where  $b$  is the base, and  $l$  is the location of the base. Individual information weight matrices are calculated for wild type and mutant sequences and compared to evaluate the effect of splicing mutations. Functional binding sites have  $R_i$  values greater than zero.

\*To produce the normal CYP3A5 protein, a T is found at chromosomal position 99,720,539, corresponding to an A at position 12,083 in the genomic sequence, and a G is found at chromosomal position 99,245,914, corresponding to a C at position 36,708 in the genomic sequence

| Allele    | Nucleotide changes     |                                           | dbSNP ID<br>(if available)    | Effect                 | Enzyme activity |                    | Reference |
|-----------|------------------------|-------------------------------------------|-------------------------------|------------------------|-----------------|--------------------|-----------|
|           | Gene changes           | Additional changes                        |                               |                        | In vivo         | In vitro           |           |
| CYP3A5*3A | NG_007938.1:g.12083A>G | g.36708C>T                                | rs776746, rs15524             | Splicing defect        | Decreased       | Severely decreased | 4         |
| CYP3A5*3B | NG_007938.1:g.12083A>G | g.36708C>T, His30Tyr, Lys34X <sup>1</sup> | rs776746, rs15524, rs28383468 | Splicing defect; H30Y  |                 | Severely decreased | 13        |
| CYP3A5*3C | NG_007938.1:g.12083A>G |                                           | rs776746                      | Splicing defect        |                 | Severely decreased | 13        |
| CYP3A5*3D | NG_007938.1:g.12083A>G | Leu82Arg                                  | rs776746, rs56244447          | Splicing defect; L82R  |                 | Severely decreased | 17        |
| CYP3A5*3E | NG_007938.1:g.12083A>G | g.36708C>T, g.32147A>G                    | rs776746, rs15524, rs28365094 | Splicing defect        |                 | Severely decreased | 17        |
| CYP3A5*3F | NG_007938.1:g.12083A>G | g.36708C>T, Ile488Thr                     | rs776746, rs15524, rs28365085 | Splicing defect; I488T |                 | Severely decreased | 18        |
| CYP3A5*3G | NG_007938.1:g.12083A>G | g.36708C>T, g.18049T>C                    | rs776746, rs15524, rs55965422 | Splicing defect        |                 | Severely decreased | 18        |
| CYP3A5*3H | NG_007938.1:g.12083A>G | g.36708C>T, g.18205T>C                    | rs776746, rs15524, n/a        | Splicing defect        |                 | Severely decreased | 18        |
| CYP3A5*3I | NG_007938.1:g.12083A>G | g.36708C>T, g.22000A>G                    | rs776746, rs15524, rs72552790 | Splicing defect        |                 | Severely decreased | 18        |
| CYP3A5*3J | NG_007938.1:g.12083A>G | g.36708C>T, Ile456Val                     | rs776746, rs15524, n/a        | Splicing defect; I456V |                 | Severely decreased | 18        |
| CYP3A5*3K | NG_007938.1:g.12083A>G | g.36708C>T, Phe446Ser                     | rs776746, rs15524, rs41279854 | Splicing defect; F446S | Decreased       |                    | 17        |
| CYP3A5*3L | NG_007938.1:g.12083A>G | Tyr53Cys                                  | rs776746, rs72552791          | Splicing defect; Y53C  | Decreased       |                    | 15        |

<sup>1</sup>Variant results in a frameshift, ultimately leading to premature termination

Despite the additional mutations found in many of these versions of the CYP3A5\*3 allele, the critical mutation common to all the CYP3A5\*3 alleles is the aberrant splicing caused by the rs776746 mutation in intron 3 [4, 13, 15, 17, 18].

Kuehl et al. discovered two other alternatively spliced versions of CYP3A5\*3 that include not only part of intron 3, but also introns 4 and 5 (the included pseudo exons are labeled 3B, 4B, and 5B respectively) [4].

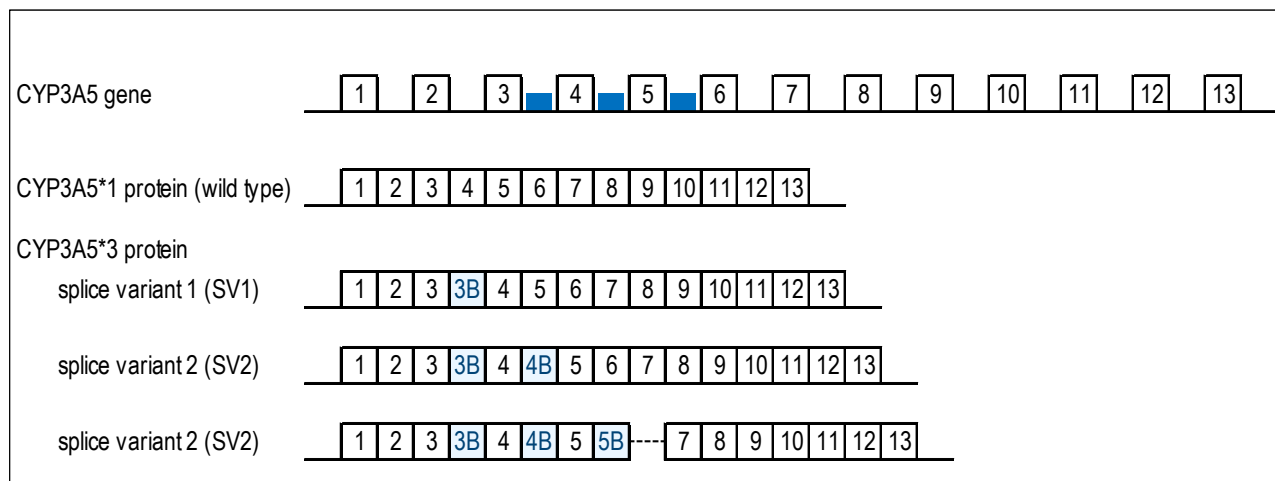

Alternatively spliced versions of CYP3A5\*3 [4].

The additional SNP (rs6977165) that results in SV2 is a substitution of adenine with a guanine base at genomic position 13,225 (chromosomal position 99,269,397T>C) [9, 12]. This creates a 3.5 bit donor site (wild type donor site is 0.1 bits), which in combination with a preexisting 5.4 bit acceptor site results in inclusion of the cryptic exon 4B in the final transcript [12]. The incorporation of exon 5B occurs concomitantly with the skipping of exon 6 as a result of the overlapping stronger 5B donor site (3.8 bits) with the weaker downstream acceptor site (3.4 bits) of the adjacent exon 6 [12].

Not only do the CYP3A5\*3 alleles yield little to no protein, but the transcribed alternatively spliced RNAs are degraded faster than wild type mRNA [19]. Busi and Cresteil note that splice variants that contain exon 3B are more unstable than wild type CYP3A5 mRNA [19].

**Allele frequency.** As CYP3A5\*3 is the most common form of CYP3A5 in several populations (table below), many have reported frequency information. Below is a breakdown of the frequency distribution for this allele.

| CYP3A5*3 (A>G); rs776746 |                     |           |                     |           |             |           |             |           |
|--------------------------|---------------------|-----------|---------------------|-----------|-------------|-----------|-------------|-----------|
| Population               | Hustert et al. [13] |           | Makeeva et al. [20] |           | DPDR* [21]  |           | HapMap [22] |           |
|                          | Sample size         | Frequency | Sample size         | Frequency | Sample size | Frequency | Sample size | Frequency |
| European/Caucasian       | 366                 | 95.1%     | 3,538               | 92.3%     | 88          | 97.7%     | 796         | 95.7%     |
| African-American         | 90–100              | 27%       |                     |           | 60          | 36.7%     | 768         | 44.8%     |
| Japanese                 | 90–100              | 71%       | 1,304               | 75.5%     |             |           | 344         | 73.3%     |
| Chinese                  | 90–100              | 73%       | 576                 | 76.0%     |             |           | 672         | 73.2%     |
| Koreans                  | 90–100              | 70%       | —                   | 78.0%     |             |           |             |           |
| Asian                    |                     |           |                     |           | 96          | 68.8%     |             |           |
| African                  |                     |           |                     |           | 48          | 12.5%     | 812         | 14.3%     |
| Hispanic/Mexican         |                     |           |                     |           | 88          | 75.0%     | 200         | 74.0%     |
| American Indian          |                     |           |                     |           |             |           | 352         | 75.6%     |

\* DNA Polymorphism Discovery Resource.

From the table, the CYP3A5\*3 allele appears to be the dominant form of the gene in most populations, with most groups reporting the frequency in European and Caucasian populations to be over 90%. The groups with the lowest frequencies are from African origin. Park et al. [23], in determining SNP frequencies in a Korean population, found that the overall frequency of the \*3 allele was 76.5% in the 194 Koreans genotyped, 185 (95.3%) of which had at least 1 CYP3A5\*3 allele. Of those, 112 of the 185 individuals (60.5%) were homozygous for the allele, and the other 73 (39.5%) were heterozygous. In addition, when examining diplotypes, Park et al. [23] discovered 4 of the 12 versions of the \*3 allele in the Korean population, the most common being CYP3A5\*3A (94.6% of \*3 alleles; 72.4% of all alleles), followed by \*3C (4.4% and 3.4%, respectively), \*3G (0.7% and 0.5%), and \*3F (0.3% and 0.3%).

Kuehl et al. also found complete concordance between the CYP3A5\*3 and CYP3AP1\*3 genotypes in Caucasians [4].

### CYP3A5\*6

**Functional characterization.** The CYP3A5\*6 variant (rs10264272) is a result of a single nucleotide polymorphism in the 7th exon, in which a cytosine (C) is replaced by a thymine (T) at position 99,262,835 [9]. Due to the redundancy in the genetic code, this substitution does not alter the lysine at position 208. However, as a result of this synonymous mutation, the entire exon 7 is deleted from the final mRNA, and the translated protein is found to have reduced

catalytic activity [4]. The silent mutation may cause exon 7 skipping by disrupting an exonic splicing enhancer, as proposed by Kuehl et al. [4], but information analysis by Rogan et al. [12] with models of serine-arginine (SR) rich protein binding sites failed to reveal any difference in the strengths or distribution of the splice sites as a result of this mutation. In examining weight matrices, Rogan et al. [12] indicate that this mutation is predicted to have only a minor effect on splicing, strengthening a cryptic acceptor splice site 22 nucleotides upstream of exon 7 by 0.7 bits to 3.6 bits. Consequently, the mutation would not be expected to activate these splice sites, as they contain less information than either natural donor or acceptor sites [12]. A confirmed mechanism by which CYP3A5\*6 induces exon 7 skipping has not been elucidated to date.

When determining transcript levels in \*1/\*6 heterozygotes, Kuehl et al. [4] found that the wild type transcript was considerably more abundant, which Rogan et al. [12] indicated may be consistent with incomplete splicing of exon 7 rather than complete exon skipping.

**Allele frequency.** CYP3A5\*6 is rarely found in populations outside of those of African origin, as indicated in the table below.

**CYP3A5\*6 (G>A); rs10264272**

| Population         | Hustert et al. [13] |           | Roy et al. [24] |           | DPDR* [21]  |           | HapMap [22] |           |
|--------------------|---------------------|-----------|-----------------|-----------|-------------|-----------|-------------|-----------|
|                    | Sample size         | Frequency | Sample size     | Frequency | Sample size | Frequency | Sample size | Frequency |
| European/Caucasian | 366                 | —         | 308             | —         | 84          | —         | 588         | 0.3%      |
| African-American   | 90                  | 13.0%     |                 |           | 52          | 11.5%     | 768         | 13.3%     |
| Japanese           | 90–100              | —         |                 |           |             |           | 340         | 0.6%      |
| Chinese            | 90–100              | —         |                 |           |             |           | 336         | 0.6%      |
| Koreans            | 90–100              | —         |                 |           |             |           |             |           |
| Asian              |                     |           | 96              | —         | 92          | —         |             |           |
| African            |                     |           | 400             | 22.0%     | 32          | 25.0%     | 812         | 20.4%     |
| Hispanic/Mexican   |                     |           |                 |           | 84          | —         | 196         | 3.1%      |

\* DNA Polymorphism Discovery Resource.

In comparing the frequencies of the CYP3A5\*3 allele with those of the CYP3A5\*6 allele, one can surmise why this variant is rarely found in populations that primarily express the CYP3A5\*3 allele.

### CYP3A5 drug tables

The tables below summarize information from the Indiana University Clinical Pharmacology website (Flockhart table) [25] and the literature for some of the more common medicines that interact with the CYP3A proteins. Many drugs are substrates for both CYP3A4 and CYP3A5 and as such, can be metabolized by either enzyme [26]. Below, drugs are classified based on the primary CYP3A family member believed to be involved.

| CYP3A5 Substrates                    | Evidence   |
|--------------------------------------|------------|
| <b>Macrolide antibiotics:</b>        |            |
| NOT azithromycin                     | 25         |
| <b>Benzodiazepines:</b>              |            |
| alprazolam                           | 25, 27     |
| diazepam→3OH                         | 5, 25      |
| midazolam                            | 5, 25, 26  |
| triazolam                            | 25, 28     |
| <b>Calcium Channel Blockers:</b>     |            |
| nifedipine                           | 15, 25, 29 |
| verapamil                            | 5, 25, 30  |
| <b>HMG CoA Reductase Inhibitors:</b> |            |
| atorvastatin                         | 5, 25, 31  |
| lovastatin                           | 25, 31     |
| NOT pravastatin                      | 25, 32     |
| NOT rosuvastatin                     | 25, 33     |
| simvastatin                          | 25, 31, 34 |
| <b>HIV Antivirals:</b>               |            |
| indinavir                            | 25, 35     |
| saquinavir                           | 25, 36     |
| <b>Immune Modulators:</b>            |            |
| cyclosporine                         | 25, 37, 38 |
| tacrolimus (FK506)                   | 25, 39     |
| <b>Steroid 6beta-OH:</b>             |            |
| aldosterone                          | 40         |
| hydrocortisone                       | 25, 41     |
| progesterone                         | 5, 25, 42  |
| testosterone                         | 5, 25, 42  |
| <b>Other Substrates:</b>             |            |
| aconitine                            | 43         |
| alfentanil                           | 25, 44, 45 |
| boceprevir                           | 25, 46     |
| carbamazepine                        | 26         |
| cilostazol                           | 25, 47     |
| codeine                              | 25, 48     |

| CYP3A5 Substrates           | Evidence   |
|-----------------------------|------------|
| <b>Other Substrates:</b>    |            |
| dexamethasone               | 5, 25, 49  |
| dextromethorphan            | 5, 25, 26  |
| irinotecan (antineoplastic) | 5, 25, 50  |
| lidocaine                   | 25, 26     |
| ondansetron                 | 25, 51     |
| oxycodone                   | 52         |
| quinine                     | 25, 53     |
| retinoic acid               | 5, 54      |
| risperidone                 | 25, 55     |
| sildenafil (Viagra)         | 25, 56     |
| sirolimus                   | 25, 57     |
| sunitinib                   | 25, 58     |
| tamoxifen→N-DMT             | 25, 59     |
| taxol (paclitaxel)          | 25, 60     |
| vincristine                 | 25, 61, 62 |
| udenafil                    | 56         |
| vardenafil                  | 56         |

| CYP3A5 Inducers               | Evidence  |
|-------------------------------|-----------|
| <b>HIV Antivirals:</b>        |           |
| efavirenz                     | 25, 63    |
| nevirapine                    | 25, 64    |
| <b>Glucocorticoids</b>        |           |
| beclomethasone                | 5, 25, 65 |
| budesonide                    | 5, 25, 65 |
| dexamethasone                 | 5, 25, 65 |
| dipropionate                  | 25, 65    |
| <b>Unclassified Inducers:</b> |           |
| carbamazepine                 | 25, 66    |
| cyclosporin                   | 66        |
| oxcarbazepine                 | 25, 67    |
| phenobarbital                 | 5, 25, 68 |
| phenytoin                     | 25, 66    |
| rifampin                      | 25, 66    |

| CYP3A5 Inhibitors              | Evidence   |
|--------------------------------|------------|
| <b>Strong Inhibitors</b>       |            |
| <b>HIV Antivirals:</b>         |            |
| nelfinavir                     | 25, 69, 70 |
| ritonavir                      | 25, 69, 70 |
| saquinavir                     | 25, 69     |
| <b>Other strong inhibitors</b> |            |
| fluconazole                    | 25, 71     |
| itraconazole                   | 25, 71     |
| voriconazole                   | 25, 71     |
| <b>Moderate Inhibitors</b>     |            |
| fluconazole                    | 25, 72     |
| grapefruit juice               | 25, 41     |
| verapamil                      | 25, 73     |
| diltiazem                      | 25, 74     |
| <b>Weak Inhibitors</b>         |            |
| cimetidine                     | 25, 75     |
| indinavir                      | 25, 69     |
| amprenavir                     | 25, 69     |
| <b>Unclassified Inhibitors</b> |            |
| NOT azithromycin               | 25         |
| imatinib                       | 25, 76     |
| lapatinib                      | 77         |

Several groups either only tested CYP3A4, examined CYP3A or CYP3A4/5 metabolism of various compounds, or did pharmacokinetic testing in human liver microsomes without genotyping. Consequently, these drugs (listed in red) were placed on the CYP3A4/CYP3A7 list. As CYP3A5 is the predominant CYP3A expressed outside the liver, some medications metabolized outside the liver will be metabolized by CYP3A5, even if CYP3A4 is the primary enzyme involved in metabolism [78]. This is not a comprehensive list.

| CYP3A4/CYP3A7 substrates             | 1° CYP   | Evidence      |
|--------------------------------------|----------|---------------|
| <b>Macrolide antibiotics:</b>        |          |               |
| clarithromycin                       | 3A4      | 5, 25, 79     |
| <b>Antihistamines:</b>               |          |               |
| astemizole (FDA removed 1999)        | 3A4      | 25, 80        |
| chlorpheniramine                     | 2D6, 3A4 | 5, 25         |
| terfenadine                          | 3A4      | 5, 25, 26     |
| <b>HIV Antivirals:</b>               |          |               |
| amprenavir                           | 3A4      | 5, 81         |
| nelfinavir                           | 3A4      | 5, 25, 82     |
| ritonavir                            |          | 5, 25, 83, 84 |
| <b>Prokinetic:</b>                   |          |               |
| cisapride                            | 3A4      | 5, 25, 85     |
| <b>Calcium Channel Blockers:</b>     |          |               |
| amlodipine                           | 3A4      | 5,25, 86, 87  |
| diltiazem                            | 3A4      | 5, 25, 88     |
| felodipine                           | 3A4      | 5, 25, 86, 89 |
| lercanidipine                        | 3A4, 2D6 | 5, 25, 86     |
| nisoldipine                          | 3A4      | 5, 25, 90     |
| nitrendipine                         | 3A4      | 5, 25, 86, 91 |
| <b>HMG CoA Reductase Inhibitors:</b> |          |               |
| cerivastatin                         | 3A4      | 5, 25, 92, 93 |
| <b>Steroid 6beta-OH:</b>             |          |               |
| estradiol                            | 3A4      | 5, 25, 94     |
| <b>Kinase Inhibitors</b>             |          |               |
| dasatinib                            | 3A4      | 95            |
| erlotinib                            | 3A4      | 95            |
| gefitinib                            | 3A4      | 95            |
| lapatinib                            | 3A4      | 25, 95        |
| imatinib                             | 3A4      | 95            |
| nilotinib                            | 3A4      | 95            |
| sorafenib                            | 3A4      | 25, 95        |

Color denotes only CYP3A4 or CYP3A checked in literature

| CYP3A4/CYP3A7 substrates            | 1° CYP   | Evidence        |
|-------------------------------------|----------|-----------------|
| <b>Other Substrates:</b>            |          |                 |
| amiodarone                          | 3A4      | 25, 96          |
| aprepitant                          | 3A4      | 25, 97          |
| ariprazole                          | 3A4, 2D6 | 25, 98          |
| arteether (antimalarial)            | 3A4      | 5, 99           |
| bupirone                            | 3A4      | 5, 25, 100      |
| cafergot                            |          | 25              |
| caffeine→TMU                        | 1A2, 3A4 | 5, 25, 101      |
| Chloroquine                         | 3A4      | 102             |
| cinacalcet                          | 3A4      | 25, 103         |
| cocaine                             | 3A4      | 5, 25, 104      |
| codeine-N-demethylation             | 3A4      | 5, 25, 105      |
| cyclosporin                         | 3A4      | 5               |
| dapsone                             | 3A4      | 5, 25, 106, 107 |
| docetaxel                           | 3A4      | 5, 25, 108      |
| domperidone                         | 3A4      | 25, 109         |
| eplerenone                          | 3A4      | 25, 110         |
| ergotamine                          | 3A4      | 5, 25, 111      |
| erythromycin                        | 3A4      | 25, 26          |
| estradiol                           | 3A4      | 5, 25, 94, 112  |
| etoposide (antineoplastic)          | 3A4      | 5, 113          |
| ezlopitant (antiemetic)             | 3A4      | 5, 114          |
| fentanyl                            | 3A4      | 5, 25, 115, 116 |
| finasteride                         | 3A4      | 5, 25, 117      |
| gleevec (imatinib)                  | 3A4      | 25, 118         |
| halofantrine (antimalarial)         | 3A4      | 5, 119          |
| haloperidol                         | 3A4      | 5, 25, 120, 121 |
| levo-alpha-acetylmethadol (LAAM)    | 3A4      | 5, 25, 122      |
| losartan (Angio II recp antagonist) | 3A4      | 5, 123          |
| methadone                           | 3A4, 3A7 | 5, 25, 124      |
| naphthalene                         | 3A4      | 125             |
| nateglinide                         | 3A4      | 25, 126         |
| pimozide                            | 3A4      | 5, 25, 127      |
| NOT pravastatin                     |          | 25, 128         |
| propranolol                         | 2D6, 3A4 | 25, 129         |
| quetiapine                          | 3A4      | 5, 25, 130      |
| salmeterol                          | 3A4      | 5, 25, 131      |
| telaprevir                          | 3A4      | 25, 132         |
| telithromycin                       | 3A4      | 25, 133         |
| teniposide (antineoplastic)         | 3A4      | 5, 134          |
| terfenadine                         | 3A4      | 5, 25, 26       |
| torisel (temsirolimus)              | 3A4      | 25, 135         |
| trazodone                           | 3A4      | 5, 25, 136      |
| zaleplon                            | 3A4      | 25, 136         |
| ziprasidone                         | 3A4      | 25, 137         |
| zolpidem                            | 3A4      | 25, 138         |
| zonisamide                          | 3A4      | 5, 139          |
| zotepine (antipsychotic)            | 3A4      | 5, 140          |

Color denotes only CYP3A4 or CYP3A checked in literature



| CYP3A4/CYP3A7 Inhibitors       | 1° CYP | Evidence       |
|--------------------------------|--------|----------------|
| <b>Strong Inhibitors</b>       |        |                |
| HIV Antivirals:                |        |                |
| amprenavir                     | 3A4    | 5, 69          |
| indinavir                      | 3A4    | 5, 25, 69      |
| Other strong inhibitors        |        |                |
| clarithromycin                 | 3A4    | 5, 141         |
| ketoconazole                   | 3A4    | 5, 25, 28, 109 |
| telithromycin                  | 3A4    | 25, 133        |
| nefazodone                     | 3A4    | 5, 25, 142     |
| <b>Moderate Inhibitors</b>     |        |                |
| aprepitant                     | 3A4    | 25, 143        |
| erythromycin                   | 3A4    | 25, 144        |
| fluoxetine                     | 3A4    | 145            |
| fluvoxamine                    | 3A4    | 25, 146        |
| <b>Unclassified Inhibitors</b> |        |                |
| amlodipine                     | 3A4    | 5, 25, 87      |
| boceprevir                     | 3A4    | 25, 147        |
| chloramphenicol                | 3A4    | 25, 148        |
| ciprofloxacin                  | 3A4    | 25, 149        |
| cyclosporin                    | 3A4    | 5, 150, 151    |
| delaviridine                   | 3A4    | 25, 145, 152   |
| gestodene                      | 3A4    | 25, 145        |
| mibefradil                     | 3A4    | 25, 153        |
| mifepristone                   | 3A4    | 25, 154, 155   |
| norfloxacin                    | 3A4    | 25, 156        |
| norfluoxetine                  | 3A4    | 5, 25, 157     |
| starfruit                      | 3A4    | 25, 158        |
| telaprevir                     | 3A4    | 25, 159        |
| verapamil                      | 3A4    | 160            |

Color denotes only CYP3A4 or CYP3A checked in literature

| CYP3A4/CYP3A7 Inducers           | 1° CYP | Evidence    |
|----------------------------------|--------|-------------|
| <b>Barbiturates</b>              |        |             |
| cyclobarbitol                    |        | 161         |
| hexobarbitol                     |        | 161         |
| mephobarbitol                    |        | 161         |
| N-methylbarbitol                 |        | 161         |
| phenobarbitol                    |        | 161         |
| <b>Benzimidazole derivatives</b> |        |             |
| lansoprazole                     | 3A4    | 162         |
| omeprazole                       | 3A4    | 162         |
| pantoprazole                     | 3A4    | 162         |
| rabeprazole                      | 3A4    | 162         |
| <b>Unclassified Inducers:</b>    |        |             |
| clotrimazole                     | 3A4    | 5, 66       |
| mifepristone                     | 3A4    | 5, 66       |
| modafinil                        | 3A4    | 5, 163      |
| nifedipine                       | 3A4    | 66          |
| pioglitazone                     | 3A4    | 164         |
| rifabutin                        | 3A4    | 5, 165      |
| rifampicin                       | 3A4    | 5, 66       |
| ritonavir                        | 3A4    | 166         |
| rosiglitazone                    | 3A4    | 164         |
| St. John's wort                  | 3A4    | 5, 167, 168 |
| troglitazone                     | 3A4    | 164         |

Color denotes only CYP3A4 or CYP3A checked in literature

### Additional information about the reference sequences for CYP3A5

For the CYP3A5\*3 allele, the variant (rs776746) is found in the middle of intron 3 at position g.99,270,539 [9]. The reference sequences indicate that the nucleotide at this position in the gene that produces a functional CYP3A5 enzyme is a guanine (G), and the variant is an adenine (A):

```
NC_000007.13:g.99270539C>T*  
NG_007938.1:g.12083G>A  
NM_000777.3:c.219-237G>A
```

\* Chromosomal DNA (NC\_##) always references the positive strand. The CYP3A5 gene is on the negative strand, thus the complementary bases are found in the genomic (NG\_##) and cDNA (NM\_##) reference sequences [169].

According to Kuehl et al. [4], the nucleotide base at position 22,893 in the CYP3A5 \*3 sequence (Bacterial artificial chromosome [BAC] AC005020) is a G; it is the causative mutation. The authors state that a G at this position creates a cryptic splice site, which results in inclusion of the remaining portion of the intron in the final mRNA. A prematurely truncated, nonfunctional protein is translated as a result.

Given this conflicting information, a Basic Local Alignment Search Tool (BLAST) search was performed [170]. Position 22,893 in AC005020 aligned to position 12,083 in reference sequence NG\_007983 (100% sequence identity in the gene region). The base is listed as a G at that position in both, further confirming the reference sequence and the \*3 variant sequence as reported by Kuehl et al. are the same.

After contacting several experts, a final clarification email to a reference sequence curator resulted in a resolution. An adenine at this position results in a fully functional protein; the guanine creates the cryptic splice site responsible for the nonfunctional protein. The Genome Research Consortium was contacted by the curator to make them aware of this issue and suggest that the reference genome sequence represent the CYP3A5 \*1 allele (A present at this position).

As this variant is found in approximately 80% of Europeans and Asians and only roughly 5%–20% of individuals of African origin, the majority non-African populations will test positive for this SNP [171].

### References

1. Pruitt KD, Tatusova T, Klimke W, Maglott DR. NCBI reference sequences: current status, policy and new initiatives. *Nucleic Acids Res.* 2009 Jan;37(Database issue):D32–36. DOI: <http://dx.doi.org/10.1093/nar/gkn721>.
2. Zanger UM, Turpeinen M, Klein K, Schwab M. Functional pharmacogenetics/genomics of human cytochromes P450 involved in drug biotransformation. *Anal Bioanal Chem.* 2008 Nov;392(6):1093–108. DOI: <http://dx.doi.org/10.1007/s00216-008-2291-6>.
3. McDonagh EM, Whirl-Carrillo M, Garten Y, Altman RB, Klein TE. From pharmacogenomic knowledge acquisition to clinical applications: the PharmGKB as a clinical pharmacogenomic biomarker resource. *Biomark Med.* 2011 Dec;5(6):795–806. DOI: <http://dx.doi.org/10.2217/bmm.11.94>.

4. Kuehl P, Zhang J, Lin Y, Lamba J, Assem M, Schuetz J, Watkins PB, Daly A, Wrighton SA, Hall SD, Maurel P, Relling M, Brimer C, Yasuda K, Venkataramanan R, Strom S, Thummel K, Boguski MS, Schuetz E. Sequence diversity in CYP3A promoters and characterization of the genetic basis of polymorphic CYP3A5 expression. *Nat Genet.* 2001 Apr;27(4):383–91. DOI: <http://dx.doi.org/10.1038/86882>.
5. Rendic S. Summary of information on human CYP enzymes: human P450 metabolism data. *Drug Metab Rev.* 2002 May;34(1–2):83–448. DOI: <http://dx.doi.org/10.1081/DMR-120001392>.
6. Altschul SF, Madden TL, Schäffer AA, Zhang J, Zhang Z, Miller W, Lipman DJ. Gapped BLAST and PSI-BLAST: a new generation of protein database search programs. *Nucleic Acids Res.* 1997 Sep 1;25(17):3389–402.
7. CYP3A5 allele nomenclature [Internet]. Human Cytochrome P450 Allele Nomenclature Database; 2008 [cited 12 Apr 2012]. <<http://www.cypalleles.ki.se/cyp3a5.htm>>.
8. Osier MV, Cheung KH, Kidd JR, Pakstis AJ, Miller PL, Kidd KK. ALFRED: an allele frequency database for anthropology. *Am J Phys Anthropol.* 2002 Sep;119(1):77–83. DOI: <http://dx.doi.org/10.1002/ajpa.10094>.
9. Sherry ST, Ward MH, Kholodov M, Baker J, Phan L, Smigielski EM, Sirotkin K. dbSNP: the NCBI database of genetic variation. *Nucleic Acids Res.* 2001 Jan 1;29(1):308–11.
10. Flicek P, Amode MR, Barrell D, Beal K, Brent S, Chen Y, Clapham P, Coates G, Fairley S, Fitzgerald S, Gordon L, Hendrix M, Hourlier T, Johnson N, Kähäri A, Keefe D, Keenan S, Kinsella R, Kokocinski F, Kulesha E, Larsson P, Longden I, McLaren W, Overduin B, Pritchard B, Riat HS, Rios D, Ritchie GRS, Ruffier M, Schuster M, Sobral D, Spudich G, Tang YA, Trevanion S, Vandrovcova J, Vilella AJ, White S, Wilder SP, Zadissa A, Zamora J, Aken BL, Birney E, Cunningham F, Dunham I, Durbin R, Fernández-Suarez XM, Herrero J, Hubbard TJP, Parker A, Proctor G, Vogel J, Searle SMJ. Ensembl 2011. *Nucleic Acids Res.* 2011 Jan;39(Database issue):D806. DOI: <http://dx.doi.org/10.1093/nar/gkq1064>.
11. Berg JM, Tymoczko JL, Stryer L. *Biochemistry.* New York, NY: W.H. Freeman; 2007.
12. Rogan PK, Svojanovsky S, Leeder JS. Information theory-based analysis of CYP2C19, CYP2D6 and CYP3A5 splicing mutations. *Pharmacogenetics.* 2003 Apr;13(4):207–18.
13. Hustert E, Haberl M, Burk O, Wolbold R, He YQ, Klein K, Nuessler AC, Neuhaus P, Klattig J, Eiselt R, Koch I, Zibat A, Brockmüller J, Halpert JR, Zanger UM, Wojnowski L. The genetic determinants of the CYP3A5 polymorphism. *Pharmacogenetics.* 2001 Dec;11(9):773–9.
14. Lamba J, Hebert JM, Schuetz EG, Klein TE, Altman RB. PharmGKB summary: very important pharmacogene information for CYP3A5. *Pharmacogenet Genomics.* 2012 Jul;22(7):555–8. DOI: <http://dx.doi.org/10.1097/FPC.0b013e328351d47f>.
15. Lee SJ, Van der Heiden IP, Goldstein JA, Van Schaik RHN. A new CYP3A5 variant, CYP3A5\*11, is shown to be defective in nifedipine metabolism in a recombinant cDNA expression system. *Drug Metab Dispos.* 2007 Jan;35(1):67–71. DOI: <http://dx.doi.org/10.1124/dmd.106.012310>.
16. Haufroid V, Wallemacq P, VanKerckhove V, Elens L, De Meyer M, Eddour DC, Malaise J, Lison D, Mourad M. CYP3A5 and ABCB1 polymorphisms and tacrolimus pharmacokinetics in renal transplant candidates: guidelines from an experimental study. *Am J Transplant.* 2006 Nov;6(11):2706–13. DOI: <http://dx.doi.org/10.1111/j.1600-6143.2006.01518.x>.
17. Lee SJ, Usmani KA, Chanas B, Ghanayem B, Xi T, Hodgson E, Mohrenweiser HW, Goldstein JA. Genetic findings and functional studies of human CYP3A5 single nucleotide polymorphisms in different ethnic groups. *Pharmacogenetics.* 2003 Aug;13(8):461–72. DOI: <http://dx.doi.org/10.1097/00008571-200308000-00004>.

18. Saeki M, Saito Y, Nakamura T, Murayama N, Kim SR, Ozawa S, Komamura K, Ueno K, Kamakura S, Nakajima T, Saito H, Kitamura Y, Kamatani N, Sawada J. Single nucleotide polymorphisms and haplotype frequencies of CYP3A5 in a Japanese population. *Hum Mutat.* 2003 Jun;21(6):653. DOI: <http://dx.doi.org/10.1002/humu.9147>.
19. Busi F, Cresteil T. CYP3A5 mRNA degradation by nonsense-mediated mRNA decay. *Mol Pharmacol.* 2005 Sep;68(3):808–15. DOI: <http://dx.doi.org/10.1124/mol.105.014225>.
20. Makeeva O, Stepanov V, Puzyrev V, Goldstein DB, Grossman I. Global pharmacogenetics: genetic substructure of Eurasian populations and its effect on variants of drug-metabolizing enzymes. *Pharmacogenomics.* 2008 Jul;9(7):847–68. DOI: <http://dx.doi.org/10.2217/14622416.9.7.847>.
21. Collins FS, Brooks LD, Chakravarti A. A DNA polymorphism discovery resource for research on human genetic variation. *Genome Res.* 1998 Dec;8(12):1229–31.
22. Altshuler DM, Gibbs RA, Peltonen L, Altshuler DM, Gibbs RA, Peltonen L, Dermitzakis E, Schaffner SF, Yu F, Peltonen L, Dermitzakis E, Bonnen PE, Altshuler DM, Gibbs RA, De Bakker PIW, Deloukas P, Gabriel SB, Gwilliam R, Hunt S, Inouye M, Jia X, Palotie A, Parkin M, Whittaker P, Yu F, Chang K, Hawes A, Lewis LR, Ren Y, Wheeler D, Gibbs RA, Muzny DM, Barnes C, Darvishi K, Hurler M, Korn JM, Kristiansson K, Lee C, McCarroll SA, Nemesh J, Dermitzakis E, Keinan A, Montgomery SB, Pollack S, Price AL, Soranzo N, Bonnen PE, Gibbs RA, Gonzaga-Jauregui C, Keinan A, Price AL, Yu F, Anttila V, Brodeur W, Daly MJ, Leslie S, McVean G, Moutsianas L, Nguyen H, Schaffner SF, Zhang Q, Ghorji MJR, McGinnis R, McLaren W, Pollack S, Price AL, Schaffner SF, Takeuchi F, Grossman SR, Shlyakhter I, Hostetter EB, Sabeti PC, Adebamowo CA, Foster MW, Gordon DR, Licinio J, Manca MC, Marshall PA, Matsuda I, Ngare D, Wang VO, Reddy D, Rotimi CN, Royal CD, Sharp RR, Zeng C, Brooks LD, McEwen JE. Integrating common and rare genetic variation in diverse human populations. *Nature.* 2010 Sep 2;467(7311):52–8. DOI: <http://dx.doi.org/10.1038/nature09298>.
23. Park SY, Kang YS, Jeong MS, Yoon HK, Han KO. Frequencies of CYP3A5 genotypes and haplotypes in a Korean population. *J Clin Pharm Ther.* 2008 Feb;33(1):61–5. DOI: <http://dx.doi.org/10.1111/j.1365-2710.2008.00879.x>.
24. Roy JN, Lajoie J, Zijenah LS, Barama A, Poirier C, Ward BJ, Roger M. CYP3A5 genetic polymorphisms in different ethnic populations. *Drug Metab Dispos.* 2005 Jul;33(7):884–7. DOI: <http://dx.doi.org/10.1124/dmd.105.003822>.
25. Flockhart DA. Drug interactions: cytochrome P450 drug interaction table [Internet]. Indiana University School of Medicine, Division of Clinical Pharmacology [cited 12 Apr 2012]. <<http://www.medicine.iupui.edu/clinpharm/ddis/table.aspx>>.
26. Huang W, Lin YS, McConn DJ, Calamia JC, Totah RA, Isoherranen N, Glodowski M, Thummel KE. Evidence of significant contribution from CYP3A5 to hepatic drug metabolism. *Drug Metab Dispos.* 2004 Dec;32(12):1434–45. DOI: <http://dx.doi.org/10.1124/dmd.104.001313>.
27. Galetin A, Brown C, Hallifax D, Ito K, Houston JB. Utility of recombinant enzyme kinetics in prediction of human clearance: impact of variability, CYP3A5, and CYP2C19 on CYP3A4 probe substrates. *Drug Metab Dispos.* 2004 Dec;32(12):1411–20. DOI: <http://dx.doi.org/10.1124/dmd.104.000844>.
28. Patki KC, Von Moltke LL, Greenblatt DJ. In vitro metabolism of midazolam, triazolam, nifedipine, and testosterone by human liver microsomes and recombinant cytochromes p450: role of cyp3a4 and cyp3a5. *Drug Metab Dispos.* 2003 Jul;31(7):938–44. DOI: <http://dx.doi.org/10.1124/dmd.31.7.938>.

29. Haas DM, Quinney SK, McCormick CL, Jones DR, Renbarger JL. A pilot study of the impact of genotype on nifedipine pharmacokinetics when used as a tocolytic. *J Matern Fetal Neonatal Med.* 2012 Apr;25(4):419–23. DOI: <http://dx.doi.org/10.3109/14767058.2011.583700>.
30. Jin Y, Wang YH, Miao J, Li L, Kovacs RJ, Marunde R, Hamman MA, Phillips S, Hilligoss J, Hall SD. Cytochrome P450 3A5 genotype is associated with verapamil response in healthy subjects. *Clin Pharmacol Ther.* 2007 Nov;82(5):579–85. DOI: <http://dx.doi.org/10.1038/sj.clpt.6100208>.
31. Kivistö KT, Niemi M, Schaeffeler E, Pitkälä K, Tilvis R, Fromm MF, Schwab M, Eichelbaum M, Strandberg T. Lipid-lowering response to statins is affected by CYP3A5 polymorphism. *Pharmacogenetics.* 2004 Aug;14(8):523–5.
32. Hatanaka T. Clinical pharmacokinetics of pravastatin: mechanisms of pharmacokinetic events. *Clin Pharmacokinet.* 2000 Dec;39(6):397–412.
33. Park Y, Jeong YH, Tantry US, Ahn JH, Kwon TJ, Park JR, Hwang SJ, Gho EH, Bliden KP, Kwak CH, Hwang JY, Kim S, Gurbel PA. Accelerated platelet inhibition by switching from atorvastatin to a non-CYP3A4-metabolized statin in patients with high platelet reactivity (ACCEL-STATIN) study. *Eur Heart J.* 2012 Sep;33(17):2151–62. DOI: <http://dx.doi.org/10.1093/eurheartj/ehs083>.
34. Kim KA, Park PW, Lee OJ, Kang DK, Park JY. Effect of polymorphic CYP3A5 genotype on the single-dose simvastatin pharmacokinetics in healthy subjects. *J Clin Pharmacol.* 2007 Jan;47(1):87–93. DOI: <http://dx.doi.org/10.1177/0091270006295063>.
35. Anderson PL, Lamba J, Aquilante CL, Schuetz E, Fletcher CV. Pharmacogenetic characteristics of indinavir, zidovudine, and lamivudine therapy in HIV-infected adults: a pilot study. *J Acquir Immune Defic Syndr.* 2006 Aug 1;42(4):441–9. DOI: <http://dx.doi.org/10.1097/01.qai.0000225013.53568.69>.
36. Josephson F, Allqvist A, Janabi M, Sayi J, Akillu E, Jande M, Mahindi M, Burhenne J, Bottiger Y, Gustafsson LL, Haefeli WE, Bertilsson L. CYP3A5 genotype has an impact on the metabolism of the HIV protease inhibitor saquinavir. *Clin Pharmacol Ther.* 2007 May;81(5):708–12. DOI: <http://dx.doi.org/10.1038/sj.clpt.6100117>.
37. Ferrareso M, Turolo S, Ghio L, Tirelli AS, Belingheri M, Villa R, Groppali E, Edefonti A. Association between CYP3A5 polymorphisms and blood pressure in kidney transplant recipients receiving calcineurin inhibitors. *Clin Exp Hypertens.* 2011;33(6):359–65. DOI: <http://dx.doi.org/10.3109/10641963.2011.561896>.
38. Zhu HJ, Yuan SH, Fang Y, Sun XZ, Kong H, Ge WH. The effect of CYP3A5 polymorphism on dose-adjusted cyclosporine concentration in renal transplant recipients: a meta-analysis. *Pharmacogenomics J.* 2011 Jun;11(3):237–46. DOI: <http://dx.doi.org/10.1038/tpj.2010.26>.
39. Kim IW, Noh H, Ji E, Han N, Hong SH, Ha J, Burckart GJ, Oh JM. Identification of factors affecting tacrolimus level and 5-year clinical outcome in kidney transplant patients. *Basic Clin Pharmacol Toxicol.* 2012 Oct;111(4):217–23. DOI: <http://dx.doi.org/10.1111/j.1742-7843.2012.00892.x>.
40. Fromm MF, Schmidt BMW, Pahl A, Jacobi J, Schmieder RE. CYP3A5 genotype is associated with elevated blood pressure. *Pharmacogenet Genomics.* 2005 Oct;15(10):737–41.
41. Li D, Abudula A, Abulahake M, Zhu AP, Lou YQ, Zhang GL. Influence of CYP3A5 and MDR1 genetic polymorphisms on urinary 6 beta-hydroxycortisol/cortisol ratio after grapefruit juice intake in healthy Chinese. *J Clin Pharmacol.* 2010 Jul;50(7):775–84. DOI: <http://dx.doi.org/10.1177/0091270009354997>.

42. Yamakoshi Y, Kishimoto T, Sugimura K, Kawashima H. Human prostate CYP3A5: identification of a unique 5'-untranslated sequence and characterization of purified recombinant protein. *Biochem Biophys Res Commun*. 1999 Jul 14;260(3):676–81. DOI: <http://dx.doi.org/10.1006/bbrc.1999.0960>.
43. Tang L, Ye L, Lv C, Zheng Z, Gong Y, Liu Z. Involvement of CYP3A4/5 and CYP2D6 in the metabolism of aconitine using human liver microsomes and recombinant CYP450 enzymes. *Toxicol Lett*. 2011 Apr 10;202(1):47–54. DOI: <http://dx.doi.org/10.1016/j.toxlet.2011.01.019>.
44. Klees TM, Sheffels P, Dale O, Kharasch ED. Metabolism of alfentanil by cytochrome p4503a (cyp3a) enzymes. *Drug Metab Dispos*. 2005 Mar;33(3):303–11. DOI: <http://dx.doi.org/10.1124/dmd.104.002709>.
45. Klees TM, Sheffels P, Thummel KE, Kharasch ED. Pharmacogenetic determinants of human liver microsomal alfentanil metabolism and the role of cytochrome P450 3A5. *Anesthesiology*. 2005 Mar;102(3):550–6.
46. Ghosal A, Yuan Y, Tong W, Su AD, Gu C, Chowdhury SK, Kishnani NS, Alton KB. Characterization of human liver enzymes involved in the biotransformation of boceprevir, a hepatitis C virus protease inhibitor. *Drug Metab Dispos*. 2011 Mar;39(3):510–21. DOI: <http://dx.doi.org/10.1124/dmd.110.036996>.
47. Yoo HD, Cho HY, Lee YB. Population pharmacokinetic analysis of cilostazol in healthy subjects with genetic polymorphisms of CYP3A5, CYP2C19 and ABCB1. *Br J Clin Pharmacol*. 2010 Jan;69(1):27–37. DOI: <http://dx.doi.org/10.1111/j.1365-2125.2009.03558.x>.
48. Lalovic B, Phillips B, Risler LL, Howald W, Shen DD. Quantitative contribution of CYP2D6 and CYP3A to oxycodone metabolism in human liver and intestinal microsomes. *Drug Metab Dispos*. 2004 Apr;32(4):447–54. DOI: <http://dx.doi.org/10.1124/dmd.32.4.447>.
49. Roberts PJ, Rollins KD, Kashuba ADM, Paine MF, Nelsen AC, Williams EE, Moran C, Lamba JK, Schuetz EG, Hawke RL. The influence of CYP3A5 genotype on dexamethasone induction of CYP3A activity in African Americans. *Drug Metab Dispos*. 2008 Aug;36(8):1465–9. DOI: <http://dx.doi.org/10.1124/dmd.107.020065>.
50. Santos A, Zanetta S, Cresteil T, Deroussent A, Pein F, Raymond E, Vernillet L, Risse ML, Boige V, Gouyette A, Vassal G. Metabolism of irinotecan (CPT-11) by CYP3A4 and CYP3A5 in humans. *Clin Cancer Res*. 2000 May;6(5):2012–20.
51. Stamer UM, Lee EH, Rauters NI, Zhang L, Kleine-Brueggeney M, Fimmers R, Stuber F, Musshoff F. CYP2D6- and CYP3A-dependent enantioselective plasma concentrations of ondansetron in postanesthesia care. *Anesth Analg*. 2011 Jul;113(1):48–54. DOI: <http://dx.doi.org/10.1213/ANE.0b013e31821d01bc>.
52. Naito T, Takashina Y, Yamamoto K, Tashiro M, Ohnishi K, Kagawa Y, Kawakami J. CYP3A5\*3 affects plasma disposition of noroxycodone and dose escalation in cancer patients receiving oxycodone. *J Clin Pharmacol*. 2011 Nov;51(11):1529–38. DOI: <http://dx.doi.org/10.1177/0091270010388033>.
53. Mukonzo JK, Waako P, Ogwal-Okeng J, Gustafsson LL, Aklillu E. Genetic variations in ABCB1 and CYP3A5 as well as sex influence quinine disposition among Ugandans. *Ther Drug Monit*. 2010 Jun;32(3):346–52. DOI: <http://dx.doi.org/10.1097/FTD.0b013e3181da79d6>.
54. Marill J, Cresteil T, Lanotte M, Chabot GG. Identification of human cytochrome P450s involved in the formation of all-trans-retinoic acid principal metabolites. *Mol Pharmacol*. 2000 Dec;58(6):1341–8.
55. Kang RH, Jung SM, Kim KA, Lee DK, Cho HK, Jung BJ, Kim YK, Kim SH, Han C, Lee MS, Park JY. Effects of CYP2D6 and CYP3A5 genotypes on the plasma concentrations of risperidone

- and 9-hydroxyrisperidone in Korean schizophrenic patients. *J Clin Psychopharmacol*. 2009 Jun;29(3):272–7. DOI: <http://dx.doi.org/10.1097/JCP.0b013e3181a289e0>.
56. Ku HY, Ahn HJ, Seo KA, Kim H, Oh M, Bae SK, Shin JG, Shon JH, Liu KH. The contributions of cytochromes P450 3A4 and 3A5 to the metabolism of the phosphodiesterase type 5 inhibitors sildenafil, udenafil, and vardenafil. *Drug Metab Dispos*. 2008 Jun;36(6):986–90. DOI: <http://dx.doi.org/10.1124/dmd.107.020099>.
57. Renders L, Frisman M, Ufer M, Mosyagin I, Haenisch S, Ott U, Caliebe A, Dechant M, Braun F, Kunzendorf U, Cascorbi I. CYP3A5 genotype markedly influences the pharmacokinetics of tacrolimus and sirolimus in kidney transplant recipients. *Clin Pharmacol Ther*. 2007 Feb;81(2):228–34. DOI: <http://dx.doi.org/10.1038/sj.clpt.6100039>.
58. Garcia-Donas J, Esteban E, Leandro-García LJ, Castellano DE, Del Alba AG, Climent MA, Arranz JA, Gallardo E, Puente J, Bellmunt J, Mellado B, Martínez E, Moreno F, Font A, Robledo M, Rodríguez-Antona C. Single nucleotide polymorphism associations with response and toxic effects in patients with advanced renal-cell carcinoma treated with first-line sunitinib: a multicentre, observational, prospective study. *Lancet Oncol*. 2011 Nov;12(12):1143–50. DOI: [http://dx.doi.org/10.1016/S1470-2045\(11\)70266-2](http://dx.doi.org/10.1016/S1470-2045(11)70266-2).
59. Mugundu GM, Sallans L, Guo Y, Shaughnessy EA, Desai PB. Assessment of the impact of CYP3A polymorphisms on the formation of  $\alpha$ -hydroxytamoxifen and N-desmethyltamoxifen in human liver microsomes. *Drug Metab Dispos*. 2012 Feb;40(2):389–96. DOI: <http://dx.doi.org/10.1124/dmd.111.039388>.
60. Leskelä S, Jara C, Leandro-García LJ, Martínez A, García-Donas J, Hernando S, Hurtado A, Vicario JCC, Montero-Conde C, Landa I, López-Jiménez E, Cascón A, Milne RL, Robledo M, Rodríguez-Antona C. Polymorphisms in cytochromes P450 2C8 and 3A5 are associated with paclitaxel neurotoxicity. *Pharmacogenomics J*. 2011 Apr;11(2):121–9. DOI: <http://dx.doi.org/10.1038/tpj.2010.13>.
61. Dennison JB, Kulanthaivel P, Barbuch RJ, Renbarger JL, Ehlhardt WJ, Hall SD. Selective metabolism of vincristine in vitro by CYP3A5. *Drug Metab Dispos*. 2006 Aug;34(8):1317–27. DOI: <http://dx.doi.org/10.1124/dmd.106.009902>.
62. Dennison JB, Jones DR, Renbarger JL, Hall SD. Effect of CYP3A5 expression on vincristine metabolism with human liver microsomes. *J Pharmacol Exp Ther*. 2007 May;321(2):553–63. DOI: <http://dx.doi.org/10.1124/jpet.106.118471>.
63. Kharasch ED, Whittington D, Ensign D, Hoffer C, Bedynek PS, Campbell S, Stubbert K, Crafford A, London A, Kim T. Mechanism of efavirenz influence on methadone pharmacokinetics and pharmacodynamics. *Clin Pharmacol Ther*. 2012 Apr;91(4):673–84. DOI: <http://dx.doi.org/10.1038/clpt.2011.276>.
64. Ciccacci C, Borgiani P, Ceffa S, Sirianni E, Marazzi MC, Altan AMD, Paturzo G, Bramanti P, Novelli G, Palombi L. Nevirapine-induced hepatotoxicity and pharmacogenetics: a retrospective study in a population from Mozambique. *Pharmacogenomics*. 2010 Jan;11(1):23–31. DOI: <http://dx.doi.org/10.2217/pgs.09.142>.
65. Usui T, Saitoh Y, Komada F. Induction of CYP3As in HepG2 cells by several drugs. association between induction of CYP3A4 and expression of glucocorticoid receptor. *Biol Pharm Bull*. 2003 Apr;26(4):510–7. DOI: <http://dx.doi.org/10.1248/bpb.26.510>.
66. Hukkanen J, Väisänen T, Lassila A, Piipari R, Anttila S, Pelkonen O, Raunio H, Hakkola J. Regulation of CYP3A5 by glucocorticoids and cigarette smoke in human lung-derived cells. *J Pharmacol Exp Ther*. 2003 Feb;304(2):745–52. DOI: <http://dx.doi.org/10.1124/jpet.102.038208>.
67. Bang LM, Goa KL. Spotlight on oxcarbazepine in epilepsy. *CNS Drugs*. 2004;18(1):57–61.

68. Hukkanen J, Lassila A, Päivärinta K, Valanne S, Sarpo S, Hakkola J, Pelkonen O, Raunio H. Induction and regulation of xenobiotic-metabolizing cytochrome P450s in the human A549 lung adenocarcinoma cell line. *Am J Respir Cell Mol Biol*. 2000 Mar;22(3):360–6.
69. Granfors MT, Wang JS, Kajosaari LI, Laitila J, Neuvonen PJ, Backman JT. Differential inhibition of cytochrome P450 3A4, 3A5 and 3A7 by five human immunodeficiency virus (HIV) protease inhibitors in vitro. *Basic Clin Pharmacol Toxicol*. 2006 Jan;98(1):79–85. DOI: [http://dx.doi.org/10.1111/j.1742-7843.2006.pto\\_249.x](http://dx.doi.org/10.1111/j.1742-7843.2006.pto_249.x).
70. Ernest CS, Hall SD, Jones DR. Mechanism-based inactivation of CYP3A by HIV protease inhibitors. *J Pharmacol Exp Ther*. 2005 Feb;312(2):583–91. DOI: <http://dx.doi.org/10.1124/jpet.104.075416>.
71. Yamazaki H, Nakamoto M, Shimizu M, Murayama N, Niwa T. Potential impact of cytochrome P450 3A5 in human liver on drug interactions with triazoles. *Br J Clin Pharmacol*. 2010 Jun;69(6):593–7. DOI: <http://dx.doi.org/10.1111/j.1365-2125.2010.03656.x>.
72. Kuypers DR, De Jonge H, Naesens M, Vanrenterghem Y. Effects of CYP3A5 and MDR1 single nucleotide polymorphisms on drug interactions between tacrolimus and fluconazole in renal allograft recipients. *Pharmacogenet Genomics*. 2008 Oct;18(10):861–8. DOI: <http://dx.doi.org/10.1097/FPC.0b013e328307c26e>.
73. Shen L, Fitzloff JF, Cook CS. Differential enantioselectivity and product-dependent activation and inhibition in metabolism of verapamil by human CYP3As. *Drug Metab Dispos*. 2004 Feb;32(2):186–96. DOI: <http://dx.doi.org/10.1124/dmd.32.2.186>.
74. Li JL, Wang XD, Chen SY, Liu LS, Fu Q, Chen X, Teng LC, Wang CX, Huang M. Effects of diltiazem on pharmacokinetics of tacrolimus in relation to CYP3A5 genotype status in renal recipients: from retrospective to prospective. *Pharmacogenomics J*. 2011 Aug;11(4):300–6. DOI: <http://dx.doi.org/10.1038/tpj.2010.42>.
75. Hirota N, Ito K, Iwatsubo T, Green CE, Tyson CA, Shimada N, Suzuki H, Sugiyama Y. In vitro/in vivo scaling of alprazolam metabolism by CYP3A4 and CYP3A5 in humans. *Biopharm Drug Dispos*. 2001 Mar;22(2):53–71.
76. Peng B, Lloyd P, Schran H. Clinical pharmacokinetics of imatinib. *Clin Pharmacokinet*. 2005;44(9):879–94.
77. Chan ECY, New LS, Chua TB, Yap CW, Ho HK, Nelson SD. Interaction of lapatinib with cytochrome P450 3A5. *Drug Metab Dispos*. 2012 Jul;40(7):1414–22. DOI: <http://dx.doi.org/10.1124/dmd.112.044958>.
78. Lamba JK, Lin YS, Schuetz EG, Thummel KE. Genetic contribution to variable human CYP3A-mediated metabolism. *Adv Drug Deliv Rev*. 2002 Nov 18;54(10):1271–94.
79. Rodrigues AD, Roberts EM, Mulford DJ, Yao Y, Ouellet D. Oxidative metabolism of clarithromycin in the presence of human liver microsomes. major role for the cytochrome P4503A (CYP3A) subfamily. *Drug Metab Dispos*. 1997 May;25(5):623–30.
80. Suydam LA. Antiviral Drugs Advisory Committee; notice of meeting [Internet]. Report no.: docket no. 99N–2670. Department of Health and Human Services, Food and Drug Administration; 1999 Aug [cited 12 Apr 2012]. <<http://www.gpo.gov/fdsys/pkg/FR-1999-08-23/pdf/99-21729.pdf>>.
81. Tréluyer JM, Bowers G, Cazali N, Sonnier M, Rey E, Pons G, Cresteil T. Oxidative metabolism of amprenavir in the human liver. effect of the CYP3A maturation. *Drug Metab Dispos*. 2003 Mar;31(3):275–81.
82. Lillibridge JH, Liang BH, Kerr BM, Webber S, Quart B, Shetty BV, Lee CA. Characterization of the selectivity and mechanism of human cytochrome P450 inhibition by the human



immunodeficiency virus-protease inhibitor nelfinavir mesylate. *Drug Metab Dispos.* 1998 Jul;26(7):609–16.

83. Kumar GN, Rodrigues AD, Buko AM, Denissen JF. Cytochrome P450-mediated metabolism of the HIV-1 protease inhibitor ritonavir (ABT-538) in human liver microsomes. *J Pharmacol Exp Ther.* 1996 Apr;277(1):423–31.

84. Estrela RCE, Santoro AB, Barroso PF, Tuyama M, Suarez-Kurtz G. CYP3A5 genotype has no impact on plasma trough concentrations of lopinavir and ritonavir in HIV-infected subjects. *Clin Pharmacol Ther.* 2008 Aug;84(2):205–7. DOI: <http://dx.doi.org/10.1038/clpt.2008.12>.

85. Pearce RE, Gotschall RR, Kearns GL, Leeder JS. Cytochrome P450 involvement in the biotransformation of cisapride and racemic norcisapride in vitro: differential activity of individual human CYP3A isoforms. *Drug Metab Dispos.* 2001 Dec;29(12):1548–54.

86. Klotz U. Interaction potential of lercanidipine, a new vasoselective dihydropyridine calcium antagonist. *Arzneimittelforschung.* 2002;52(3):155–61. DOI: <http://dx.doi.org/10.1055/s-0031-1299873>.

87. Bhatnagar V, Garcia EP, O'Connor DT, Brophy VH, Alcaraz J, Richard E, Bakris GL, Middleton JP, Norris KC, Wright J, Hiremath L, Contreras G, Appel LJ, Lipkowitz MS. CYP3A4 and CYP3A5 polymorphisms and blood pressure response to amlodipine among African-American men and women with early hypertensive renal disease. *Am J Nephrol.* 2010;31(2):95–103. DOI: <http://dx.doi.org/10.1159/000258688>.

88. Yamamoto T, Kubota T, Ozeki T, Sawada M, Yokota S, Yamada Y, Kumagai Y, Iga T. Effects of the CYP3A5 genetic polymorphism on the pharmacokinetics of diltiazem. *Clin Chim Acta.* 2005 Dec;362(1–2):147–54. DOI: <http://dx.doi.org/10.1016/j.cccn.2005.06.013>.

89. Walsky RL, Obach RS. Validated assays for human cytochrome P450 activities. *Drug Metab Dispos.* 2004 Jun;32(6):647–60. DOI: <http://dx.doi.org/10.1124/dmd.32.6.647>.

90. Hisaka A, Kusama M, Ohno Y, Sugiyama Y, Suzuki H. A proposal for a pharmacokinetic interaction significance classification system (PISCS) based on predicted drug exposure changes and its potential application to alert classifications in product labelling. *Clin Pharmacokinet.* 2009;48(10):653–66. DOI: <http://dx.doi.org/10.2165/11317220-000000000-00000>.

91. Guengerich FP. The 1992 Bernard B. Brodie Award Lecture: bioactivation and detoxication of toxic and carcinogenic chemicals. *Drug Metab Dispos.* 1993 Feb;21(1):1–6.

92. Boberg M, Angerbauer R, Fey P, Kanhai WK, Karl W, Kern A, Ploschke J, Radtke M. Metabolism of cerivastatin by human liver microsomes in vitro. characterization of primary metabolic pathways and of cytochrome P450 isozymes involved. *Drug Metab Dispos.* 1997 Mar;25(3):321–31.

93. Sakaeda T, Fujino H, Komoto C, Kakumoto M, Jin JS, Iwaki K, Nishiguchi K, Nakamura T, Okamura N, Okumura K. Effects of acid and lactone forms of eight HMG-CoA reductase inhibitors on CYP-mediated metabolism and MDR1-mediated transport. *Pharm Res.* 2006 Mar;23(3):506–12. DOI: <http://dx.doi.org/10.1007/s11095-005-9371-5>.

94. Williams JA, Ring BJ, Cantrell VE, Jones DR, Eckstein J, Ruterbories K, Hamman MA, Hall SD, Wrighton SA. Comparative metabolic capabilities of CYP3A4, CYP3A5, and CYP3A7. *Drug Metab Dispos.* 2002 Aug;30(8):883–91.

95. Duckett DR, Cameron MD. Metabolism considerations for kinase inhibitors in cancer treatment. *Expert Opin Drug Metab Toxicol.* 2010 Oct;6(10):1175–93. DOI: <http://dx.doi.org/10.1517/17425255.2010.506873>.

96. Ohyama K, Nakajima M, Suzuki M, Shimada N, Yamazaki H, Yokoi T. Inhibitory effects of amiodarone and its N-deethylated metabolite on human cytochrome P450 activities: prediction of in vivo drug interactions. *Br J Clin Pharmacol*. 2000 Mar;49(3):244–53.
97. Sanchez RI, Wang RW, Newton DJ, Bakhtiar R, Lu P, Chiu SHL, Evans DC, Huskey SEW. Cytochrome P450 3A4 is the major enzyme involved in the metabolism of the substance P receptor antagonist aprepitant. *Drug Metab Dispos*. 2004 Nov;32(11):1287–92. DOI: <http://dx.doi.org/10.1124/dmd.104.000216>.
98. Waade RB, Christensen H, Rudberg I, Refsum H, Hermann M. Influence of comedication on serum concentrations of aripiprazole and dehydroaripiprazole. *Ther Drug Monit*. 2009 Apr;31(2):233–8. DOI: <http://dx.doi.org/10.1097/FTD.0b013e3181956726>.
99. Grace JM, Aguilar AJ, Trotman KM, Peggins JO, Brewer TG. Metabolism of beta-arteether to dihydroqinghaosu by human liver microsomes and recombinant cytochrome P450. *Drug Metab Dispos*. 1998 Apr;26(4):313–7.
100. Zhu M, Zhao W, Jimenez H, Zhang D, Yeola S, Dai R, Vachharajani N, Mitroka J. Cytochrome P450 3A-mediated metabolism of buspirone in human liver microsomes. *Drug Metab Dispos*. 2005 Apr;33(4):500–7. DOI: <http://dx.doi.org/10.1124/dmd.104.000836>.
101. Tassaneeyakul W, Birkett DJ, McManus ME, Tassaneeyakul W, Veronese ME, Andersson T, Tukey RH, Miners JO. Caffeine metabolism by human hepatic cytochromes P450: contributions of 1A2, 2E1 and 3A isoforms. *Biochem Pharmacol*. 1994 May 18;47(10):1767–76.
102. Kim KA, Park JY, Lee JS, Lim S. Cytochrome P450 2C8 and CYP3A4/5 are involved in chloroquine metabolism in human liver microsomes. *Arch Pharm Res*. 2003 Aug;26(8):631–7.
103. Harris RZ, Salfi M, Sullivan JT, Padhi D. Pharmacokinetics of cinacalcet hydrochloride when administered with ketoconazole. *Clin Pharmacokinet*. 2007;46(6):495–501.
104. Ladona MG, Gonzalez ML, Rane A, Peter RM, De la Torre R. Cocaine metabolism in human fetal and adult liver microsomes is related to cytochrome P450 3A expression. *Life Sci*. 2000 Dec 15;68(4):431–43.
105. Caraco Y, Tateishi T, Guengerich FP, Wood AJ. Microsomal codeine N-demethylation: cosegregation with cytochrome P4503A4 activity. *Drug Metab Dispos*. 1996 Jul;24(7):761–4.
106. Ganesan S, Sahu R, Walker LA, Tekwani BL. Cytochrome P450-dependent toxicity of dapsone in human erythrocytes. *J Appl Toxicol*. 2010 Apr;30(3):271–5. DOI: <http://dx.doi.org/10.1002/jat.1493>.
107. Sharma A, Pilote S, Bélanger PM, Arsenault M, Hamelin BA. A convenient five-drug cocktail for the assessment of major drug metabolizing enzymes: a pilot study. *Br J Clin Pharmacol*. 2004 Sep;58(3):288–97. DOI: <http://dx.doi.org/10.1111/j.1365-2125.2004.02162.x>.
108. Engels FK, Ten Tije AJ, Baker SD, Lee CKK, Loos WJ, Vulto AG, Verweij J, Sparreboom A. Effect of cytochrome P450 3A4 inhibition on the pharmacokinetics of docetaxel. *Clin Pharmacol Ther*. 2004 May;75(5):448–54. DOI: <http://dx.doi.org/10.1016/j.clpt.2004.01.001>.
109. Michaud V, Simard C, Turgeon J. Characterization of CYP3A isozymes involved in the metabolism of domperidone: role of cytochrome b(5) and inhibition by ketoconazole. *Drug Metab Lett*. 2010 Apr 1;4(2):95–103. DOI: <http://dx.doi.org/10.2174/187231210791292735>.
110. Cook CS, Berry LM, Kim DH, Burton EG, Hribar JD, Zhang L. Involvement of CYP3A in the metabolism of eplerenone in humans and dogs: differential metabolism by CYP3A4 and CYP3A5. *Drug Metab Dispos*. 2002 Dec;30(12):1344–51.
111. Dresser GK, Spence JD, Bailey DG. Pharmacokinetic-pharmacodynamic consequences and clinical relevance of cytochrome P450 3A4 inhibition. *Clin Pharmacokinet*. 2000 Jan;38(1):41–57.

112. Lee AJ, Kosh JW, Conney AH, Zhu BT. Characterization of the NADPH-dependent metabolism of 17beta-estradiol to multiple metabolites by human liver microsomes and selectively expressed human cytochrome P450 3A4 and 3A5. *J Pharmacol Exp Ther.* 2001 Aug;298(2):420–32.
113. Zhuo X, Zheng N, Felix CA, Blair IA. Kinetics and regulation of cytochrome P450-mediated etoposide metabolism. *Drug Metab Dispos.* 2004 Sep;32(9):993–1000.
114. Obach RS. Mechanism of cytochrome P4503A4- and 2D6-catalyzed dehydrogenation of ezlopitant as probed with isotope effects using five deuterated analogs. *Drug Metab Dispos.* 2001 Dec;29(12):1599–607.
115. Takashina Y, Naito T, Mino Y, Yagi T, Ohnishi K, Kawakami J. Impact of CYP3A5 and ABCB1 gene polymorphisms on fentanyl pharmacokinetics and clinical responses in cancer patients undergoing conversion to a transdermal system. *Drug Metab Pharmacokinet.* 2012;27(4):414–21. DOI: <http://dx.doi.org/10.2133/dmpk.DMPK-11-RG-134>.
116. Feierman DE, Lasker JM. Metabolism of fentanyl, a synthetic opioid analgesic, by human liver microsomes. role of CYP3A4. *Drug Metab Dispos.* 1996 Sep;24(9):932–9.
117. Huskey SW, Dean DC, Miller RR, Rasmusson GH, Chiu SH. Identification of human cytochrome P450 isozymes responsible for the in vitro oxidative metabolism of finasteride. *Drug Metab Dispos.* 1995 Oct;23(10):1126–35.
118. Cohen MH, Williams G, Johnson JR, Duan J, Gobburu J, Rahman A, Benson K, Leighton J, Kim SK, Wood R, Rothmann M, Chen G, U KM, Staten AM, Pazdur R. Approval summary for imatinib mesylate capsules in the treatment of chronic myelogenous leukemia. *Clin Cancer Res.* 2002 May;8(5):935–42.
119. Baune B, Flinois JP, Furlan V, Gimenez F, Taburet AM, Becquemont L, Farinotti R. Halofantrine metabolism in microsomes in man: major role of CYP 3A4 and CYP 3A5. *J Pharm Pharmacol.* 1999 Apr;51(4):419–26.
120. Fang J, McKay G, Song J, Remillard A, Li X, Midha K. In vitro characterization of the metabolism of haloperidol using recombinant cytochrome p450 enzymes and human liver microsomes. *Drug Metab Dispos.* 2001 Dec;29(12):1638–43.
121. Kalgutkar AS, Taylor TJ, Venkatakrishnan K, Isin EM. Assessment of the contributions of CYP3A4 and CYP3A5 in the metabolism of the antipsychotic agent haloperidol to its potentially neurotoxic pyridinium metabolite and effect of antidepressants on the bioactivation pathway. *Drug Metab Dispos.* 2003 Mar;31(3):243–9.
122. Oda Y, Kharasch ED. Metabolism of levo-alpha-acetylmethadol (LAAM) by human liver cytochrome P450: involvement of CYP3A4 characterized by atypical kinetics with two binding sites. *J Pharmacol Exp Ther.* 2001 Apr;297(1):410–22.
123. Choi DH, Li C, Choi JS. Effects of myricetin, an antioxidant, on the pharmacokinetics of losartan and its active metabolite, EXP-3174, in rats: possible role of cytochrome P450 3A4, cytochrome P450 2C9 and P-glycoprotein inhibition by myricetin. *J Pharm Pharmacol.* 2010 Jul;62(7):908–14.
124. Iribarne C, Berthou F, Baird S, Dréano Y, Picart D, Bail JP, Beaune P, Ménez JF. Involvement of cytochrome P450 3A4 enzyme in the N-demethylation of methadone in human liver microsomes. *Chem Res Toxicol.* 1996 Mar;9(2):365–73. DOI: <http://dx.doi.org/10.1021/tx950116m>.
125. Korzekwa KR, Krishnamachary N, Shou M, Ogai A, Parise RA, Rettie AE, Gonzalez FJ, Tracy TS. Evaluation of atypical cytochrome P450 kinetics with two-substrate models: evidence

that multiple substrates can simultaneously bind to cytochrome P450 active sites. *Biochemistry*. 1998 Mar 24;37(12):4137–47. DOI: <http://dx.doi.org/10.1021/bi9715627>.

126. Niemi M, Backman JT, Juntti-Patinen L, Neuvonen M, Neuvonen PJ. Coadministration of gemfibrozil and itraconazole has only a minor effect on the pharmacokinetics of the CYP2C9 and CYP3A4 substrate nateglinide. *Br J Clin Pharmacol*. 2005 Aug;60(2):208–17. DOI: <http://dx.doi.org/10.1111/j.1365-2125.2005.02385.x>.

127. Desta Z, Kerbusch T, Soukhova N, Richard E, Ko JW, Flockhart DA. Identification and characterization of human cytochrome P450 isoforms interacting with pimozide. *J Pharmacol Exp Ther*. 1998 May;285(2):428–37.

128. Neuvonen PJ, Kantola T, Kivistö KT. Simvastatin but not pravastatin is very susceptible to interaction with the CYP3A4 inhibitor itraconazole. *Clin Pharmacol Ther*. 1998 Mar;63(3):332–41. DOI: [http://dx.doi.org/10.1016/S0009-9236\(98\)90165-5](http://dx.doi.org/10.1016/S0009-9236(98)90165-5).

129. Yoshimoto K, Echizen H, Chiba K, Tani M, Ishizaki T. Identification of human CYP isoforms involved in the metabolism of propranolol enantiomers—N-desisopropylation is mediated mainly by CYP1A2. *Br J Clin Pharmacol*. 1995 Apr;39(4):421–31.

130. Bakken GV, Rudberg I, Christensen H, Molden E, Refsum H, Hermann M. Metabolism of quetiapine by CYP3A4 and CYP3A5 in presence or absence of cytochrome B5. *Drug Metab Dispos*. 2009 Feb;37(2):254–8. DOI: <http://dx.doi.org/10.1124/dmd.108.023291>.

131. Cazzola M, Testi R, Matera MG. Clinical pharmacokinetics of salmeterol. *Clin Pharmacokinet*. 2002;41(1):19–30.

132. Kim JJ, Culley CM, Mohammad RA. Telaprevir: an oral protease inhibitor for hepatitis C virus infection. *Am J Health Syst Pharm*. 2012 Jan 1;69(1):19–33. DOI: <http://dx.doi.org/10.2146/ajhp110123>.

133. Vieira MLT, Zhao P, Berglund EG, Reynolds KS, Zhang L, Lesko LJ, Huang SM. Predicting drug interaction potential with a physiologically based pharmacokinetic model: a case study of telithromycin, a time-dependent CYP3A inhibitor. *Clin Pharmacol Ther*. 2012 Apr;91(4):700–8. DOI: <http://dx.doi.org/10.1038/clpt.2011.305>.

134. Relling MV, Nemeč J, Schuetz EG, Schuetz JD, Gonzalez FJ, Korzekwa KR. O-demethylation of epipodophyllotoxins is catalyzed by human cytochrome P450 3A4. *Mol Pharmacol*. 1994 Feb;45(2):352–8.

135. Cai P, Tsao R, Ruppen ME. In vitro metabolic study of temsirolimus: preparation, isolation, and identification of the metabolites. *Drug Metab Dispos*. 2007 Sep;35(9):1554–63. DOI: <http://dx.doi.org/10.1124/dmd.107.014746>.

136. Zalma A, Von Moltke LL, Granda BW, Harmatz JS, Shader RI, Greenblatt DJ. In vitro metabolism of trazodone by CYP3A: inhibition by ketoconazole and human immunodeficiency viral protease inhibitors. *Biol Psychiatry*. 2000 Apr 1;47(7):655–61.

137. Prakash C, Kamel A, Cui D, Whalen RD, Miceli JJ, Tweedie D. Identification of the major human liver cytochrome P450 isoform(s) responsible for the formation of the primary metabolites of ziprasidone and prediction of possible drug interactions. *Br J Clin Pharmacol*. 2000;49(suppl 1):35S–42S.

138. Von Moltke LL, Greenblatt DJ, Granda BW, Duan SX, Grassi JM, Venkatakrisnan K, Harmatz JS, Shader RI. Zolpidem metabolism in vitro: responsible cytochromes, chemical inhibitors, and in vivo correlations. *Br J Clin Pharmacol*. 1999 Jul;48(1):89–97.

139. Nakasa H, Nakamura H, Ono S, Tsutsui M, Kiuchi M, Ohmori S, Kitada M. Prediction of drug-drug interactions of zonisamide metabolism in humans from in vitro data. *Eur J Clin Pharmacol*. 1998 Apr;54(2):177–83.

140. Shiraga T, Kaneko H, Iwasaki K, Tozuka Z, Suzuki A, Hata T. Identification of cytochrome P450 enzymes involved in the metabolism of zotepine, an antipsychotic drug, in human liver microsomes. *Xenobiotica*. 1999 Mar;29(3):217–29. DOI: <http://dx.doi.org/10.1080/004982599238623>.
141. Mayhew BS, Jones DR, Hall SD. An in vitro model for predicting in vivo inhibition of cytochrome P450 3A4 by metabolic intermediate complex formation. *Drug Metab Dispos*. 2000 Sep;28(9):1031–7.
142. Ellingrod VL, Perry PJ. Nefazodone: a new antidepressant. *Am J Health Syst Pharm*. 1995 Dec 15;52(24):2799–812.
143. Navari RM. Aprepitant: a neurokinin-1 receptor antagonist for the treatment of chemotherapy-induced nausea and vomiting. *Expert Rev Anticancer Ther*. 2004 Oct;4(5):715–24. DOI: <http://dx.doi.org/10.1586/14737140.4.5.715>.
144. McConn D, Lin YS, Allen K, Kunze KL, Thummel KE. Differences in the inhibition of cytochromes P450 3A4 and 3A5 by metabolite-inhibitor complex-forming drugs. *Drug Metab Dispos*. 2004 Oct;32(10):1083–91.
145. Zhou SF, Xue CC, Yu XQ, Li C, Wang G. Clinically important drug interactions potentially involving mechanism-based inhibition of cytochrome P450 3A4 and the role of therapeutic drug monitoring. *Ther Drug Monit*. 2007 Dec;29(6):687–710. DOI: <http://dx.doi.org/10.1097/FTD.0b013e31815c16f5>.
146. Figgitt DP, McClellan KJ. Fluvoxamine. an updated review of its use in the management of adults with anxiety disorders. *Drugs*. 2000 Oct;60(4):925–54.
147. Boceprevir. *Prescrire Int*. 2012 Apr;21(126):89–92.
148. Park JY, Kim KA, Kim SL. Chloramphenicol is a potent inhibitor of cytochrome P450 isoforms CYP2C19 and CYP3A4 in human liver microsomes. *Antimicrob Agents Chemother*. 2003 Nov;47(11):3464–9.
149. Shahzadi A, Javed I, Aslam B, Muhammad F, Asi MR, Ashraf MY, Zia-ur-Rahman. Therapeutic effects of ciprofloxacin on the pharmacokinetics of carbamazepine in healthy adult male volunteers. *Pak J Pharm Sci*. 2011 Jan;24(1):63–8.
150. De Jonge H, De Loor H, Verbeke K, Vanrenterghem Y, Kuypers DRJ. In vivo CYP3A activity is significantly lower in cyclosporine-treated as compared with tacrolimus-treated renal allograft recipients. *Clin Pharmacol Ther*. 2011 Sep;90(3):414–22. DOI: <http://dx.doi.org/10.1038/clpt.2011.130>.
151. Amundsen R, Åsberg A, Ohm IK, Christensen H. Cyclosporine A- and tacrolimus-mediated inhibition of CYP3A4 and CYP3A5 in vitro. *Drug Metab Dispos*. 2012 Apr;40(4):655–61. DOI: <http://dx.doi.org/10.1124/dmd.111.043018>.
152. Malaty LI, Kuper JJ. Drug interactions of HIV protease inhibitors. *Drug Saf*. 1999 Feb;20(2):147–69.
153. Foti RS, Rock DA, Pearson JT, Wahlstrom JL, Wienkers LC. Mechanism-based inactivation of cytochrome P450 3A4 by mibefradil through heme destruction. *Drug Metab Dispos*. 2011 Jul;39(7):1188–95. DOI: <http://dx.doi.org/10.1124/dmd.111.038505>.
154. Khan KK, He YQ, Correia MA, Halpert JR. Differential oxidation of mifepristone by cytochromes P450 3A4 and 3A5: selective inactivation of P450 3A4. *Drug Metab Dispos*. 2002 Sep;30(9):985–90.
155. Soars MG, Grime K, Riley RJ. Comparative analysis of substrate and inhibitor interactions with CYP3A4 and CYP3A5. *Xenobiotica*. 2006 Apr;36(4):287–99. DOI: <http://dx.doi.org/10.1080/00498250500446208>.

156. McLellan RA, Drobitch RK, Monshouwer M, Renton KW. Fluoroquinolone antibiotics inhibit cytochrome P450-mediated microsomal drug metabolism in rat and human. *Drug Metab Dispos.* 1996 Oct;24(10):1134–8.
157. Von Moltke LL, Greenblatt DJ, Schmider J, Duan SX, Wright CE, Harmatz JS, Shader RI. Midazolam hydroxylation by human liver microsomes in vitro: inhibition by fluoxetine, norfluoxetine, and by azole antifungal agents. *J Clin Pharmacol.* 1996 Sep;36(9):783–91.
158. Hidaka M, Fujita K, Ogikubo T, Yamasaki K, Iwakiri T, Okumura M, Kodama H, Arimori K. Potent inhibition by star fruit of human cytochrome P450 3A (CYP3A) activity. *Drug Metab Dispos.* 2004 Jun;32(6):581–3. DOI: <http://dx.doi.org/10.1124/dmd.32.6.581>.
159. Garg V, Chandorkar G, Farmer HF, Smith F, Alves K, Van Heeswijk RPG. Effect of telaprevir on the pharmacokinetics of midazolam and digoxin. *J Clin Pharmacol.* 2012 Oct;52(10):1566–73. DOI: <http://dx.doi.org/10.1177/0091270011419850>.
160. Wang YH, Jones DR, Hall SD. Differential mechanism-based inhibition of CYP3A4 and CYP3A5 by verapamil. *Drug Metab Dispos.* 2005 May;33(5):664–71. DOI: <http://dx.doi.org/10.1124/dmd.104.001834>.
161. Murayama N, Shimada M, Yamazoe Y, Sogawa K, Nakayama K, Fujii-Kuriyama Y, Kato R. Distinct effects of phenobarbital and its N-methylated derivative on liver cytochrome P450 induction. *Arch Biochem Biophys.* 1996 Apr 1;328(1):184–92. DOI: <http://dx.doi.org/10.1006/abbi.1996.0159>.
162. Krusekopf S, Roots I, Kleeberg U. Differential drug-induced mRNA expression of human CYP3A4 compared to CYP3A5, CYP3A7 and CYP3A43. *Eur J Pharmacol.* 2003 Apr 11;466(1–2):7–12.
163. Robertson P, Hellriegel ET, Arora S, Nelson M. Effect of modafinil on the pharmacokinetics of ethinyl estradiol and triazolam in healthy volunteers. *Clin Pharmacol Ther.* 2002 Jan;71(1):46–56. DOI: <http://dx.doi.org/10.1067/mcp.2002.121217>.
164. Sahi J, Black CB, Hamilton GA, Zheng X, Jolley S, Rose KA, Gilbert D, LeCluyse EL, Sinz MW. Comparative effects of thiazolidinediones on in vitro P450 enzyme induction and inhibition. *Drug Metab Dispos.* 2003 Apr;31(4):439–46.
165. Katoh M, Watanabe M, Tabata T, Sato Y, Nakajima M, Nishimura M, Naito S, Tateno C, Iwasaki K, Yoshizato K, Yokoi T. In vivo induction of human cytochrome P450 3A4 by rifabutin in chimeric mice with humanized liver. *Xenobiotica.* 2005 Sep;35(9):863–75. DOI: <http://dx.doi.org/10.1080/00498250500296231>.
166. Kharasch ED, Bedynek PS, Walker A, Whittington D, Hoffer C. Mechanism of ritonavir changes in methadone pharmacokinetics and pharmacodynamics: II. ritonavir effects on CYP3A and P-glycoprotein activities. *Clin Pharmacol Ther.* 2008 Oct;84(4):506–12.
167. Moore LB, Goodwin B, Jones SA, Wisely GB, Serabjit-Singh CJ, Willson TM, Collins JL, Kliewer SA. St. John's wort induces hepatic drug metabolism through activation of the pregnane X receptor. *Proc Natl Acad Sci USA.* 2000 Jun 20;97(13):7500–2. DOI: <http://dx.doi.org/10.1073/pnas.130155097>.
168. Wang Z, Gorski JC, Hamman MA, Huang SM, Lesko LJ, Hall SD. The effects of St John's wort (*Hypericum perforatum*) on human cytochrome P450 activity. *Clin Pharmacol Ther.* 2001 Oct;70(4):317–26.
169. National Human Genome Research Institute. HUGO Gene Nomenclature Committee at the European Bioinformatics Institute [Internet]. The Institute [cited 12 Mar 2012]. <<http://www.genenames.org9>>.

170. Zhang Z, Schwartz S, Wagner L, Miller W. A greedy algorithm for aligning DNA sequences. *J Comput Biol.* 2000 Apr;7(1-2):203-14. DOI: <http://dx.doi.org/10.1089/10665270050081478>.
171. Kidd KK. Polymorphism information: rs776746 (data unpublished) [Internet]. ALFRED: Allele Frequency Database; 2012 [cited 12 Mar 2012].  
<[http://alfred.med.yale.edu/alfred/recordinfo.asp?condition=sites.site\\_uid=%27SI582180Y](http://alfred.med.yale.edu/alfred/recordinfo.asp?condition=sites.site_uid=%27SI582180Y)>.
